# Supplementary material for: Injectable local drug delivery systems for glioblastoma: a systematic review and meta-analysis of progress to date
Source: Royal Society of Chemistry journal article supplement (doi:10.1039/d2bm01534j), 2023-01-01
Supplement: d2bm01534j1.pdf [file d2bm01534j1.pdf]

## Supporting Information

### Injectable local drug delivery systems for glioblastoma: a systematic review and meta-analysis of progress to date

Yu Wang, Chiara Bastiancich, Ben Newland\*

Table S1. The specifics of quality assessment scores allocated to each included article

| Year | 1st Author             | 1 | 2 | 3 | 4 | 5 | 6 | 7  | 8  | 9 | 10  | 11 | 12 | Total | Ref.          |
|------|------------------------|---|---|---|---|---|---|----|----|---|-----|----|----|-------|---------------|
| 2021 | Parkins                | 1 | 0 | 1 | 0 | 1 | 1 | 1  | 1  | 0 | 1   | 1  | 0  | 8     | <sup>1</sup>  |
| 2021 | Zhou                   | 1 | 0 | 1 | 0 | 1 | 1 | 1  | 0  | 0 | 0   | 0  | 0  | 5     | <sup>2</sup>  |
| 2021 | Zhang                  | 1 | 0 | 1 | 0 | 1 | 1 | 1  | 1  | 0 | 1   | 0  | 1  | 8     | <sup>3</sup>  |
| 2020 | Allen                  | 1 | 0 | 1 | 0 | 1 | 0 | 0  | 0  | 0 | NDS | 1  | 1  | 5     | <sup>4</sup>  |
| 2019 | Pang                   | 1 | 0 | 1 | 0 | 1 | 1 | 1  | 1  | 1 | NDS | 0  | 1  | 8     | <sup>5</sup>  |
| 2018 | Lin                    | 1 | 0 | 0 | 0 | 1 | 1 | 1  | 1  | 1 | 0   | 0  | 0  | 6     | <sup>6</sup>  |
| 2017 | Wehbe                  | 1 | 0 | 0 | 0 | 1 | 1 | 1  | 1  | 0 | 0   | 1  | 0  | 6     | <sup>7</sup>  |
| 2017 | Singleton<br>Nordling- | 1 | 0 | 1 | 1 | 1 | 1 | 1  | RP | 0 | NDS | 1  | 1  | 8     | <sup>8</sup>  |
| 2017 | David                  | 1 | 0 | 0 | 0 | 1 | 1 | 1  | 1  | 0 | 1   | 1  | 1  | 8     | <sup>9</sup>  |
| 2017 | Adhikari               | 1 | 0 | 0 | 0 | 1 | 1 | 1  | 1  | 0 | NDS | 0  | 1  | 6     | <sup>10</sup> |
| 2017 | Chen                   | 1 | 0 | 1 | 0 | 1 | 1 | 1  | 1  | 0 | NDS | 1  | 0  | 7     | <sup>11</sup> |
| 2017 | Bastiancich            | 1 | 0 | 1 | 0 | 1 | 1 | 1  | 1  | 1 | 1   | 1  | 1  | 10    | <sup>12</sup> |
| 2016 | Zhang                  | 1 | 0 | 1 | 0 | 1 | 1 | 1  | 1  | 0 | NDS | 0  | 0  | 6     | <sup>13</sup> |
| 2016 | Xu                     | 1 | 0 | 1 | 0 | 1 | 1 | 1  | 1  | 0 | NDS | 0  | 1  | 7     | <sup>14</sup> |
| 2016 | Gaudin                 | 1 | 0 | 0 | 0 | 1 | 1 | 1  | 1  | 0 | NDS | 1  | 0  | 6     | <sup>15</sup> |
| 2016 | Barth                  | 1 | 0 | 1 | 0 | 1 | 1 | 1  | RP | 0 | NDS | 1  | 1  | 7     | <sup>16</sup> |
| 2015 | Lollo                  | 1 | 0 | 0 | 0 | 1 | 0 | 1  | 1  | 0 | 0   | 1  | 1  | 6     | <sup>17</sup> |
| 2014 | Stephen                | 1 | 0 | 0 | 0 | 1 | 0 | 1  | 1  | 0 | NDS | 1  | 0  | 5     | <sup>18</sup> |
| 2014 | Bernal                 | 1 | 0 | 1 | 0 | 1 | 1 | 1  | RP | 0 | NDS | 0  | 0  | 5     | <sup>19</sup> |
| 2014 | Xi                     | 1 | 0 | 0 | 0 | 1 | 1 | RP | RP | 0 | NDS | 0  | 1  | 4     | <sup>20</sup> |
| 2013 | Vellimana              | 1 | 0 | 0 | 0 | 1 | 0 | RP | RP | 0 | NDS | 0  | 0  | 2     | <sup>21</sup> |
| 2013 | Zhou                   | 0 | 0 | 0 | 0 | 1 | 1 | 1  | 1  | 0 | NDS | 1  | 0  | 5     | <sup>22</sup> |
| 2013 | Chen                   | 1 | 0 | 0 | 0 | 1 | 1 | 1  | RP | 0 | NDS | 1  | 1  | 6     | <sup>23</sup> |
| 2012 | Ozeki                  | 1 | 0 | 0 | 0 | 1 | 0 | 1  | 1  | 0 | 0   | 0  | 0  | 4     | <sup>24</sup> |
| 2012 | Glage                  | 1 | 0 | 1 | 1 | 1 | 1 | 1  | 1  | 0 | 0   | 0  | 1  | 8     | <sup>25</sup> |
| 2012 | Laine                  | 1 | 0 | 0 | 0 | 1 | 0 | 1  | 1  | 0 | 0   | 0  | 0  | 4     | <sup>26</sup> |
| 2011 | Zhang                  | 1 | 0 | 1 | 0 | 1 | 0 | 1  | 1  | 0 | 0   | 0  | 1  | 6     | <sup>27</sup> |
| 2010 | Allard                 | 1 | 0 | 1 | 0 | 1 | 0 | 1  | 1  | 0 | NDS | 0  | 0  | 5     | <sup>28</sup> |
| 2010 | Tyler                  | 1 | 0 | 1 | 0 | 0 | 1 | 1  | 1  | 0 | 0   | 0  | 0  | 5     | <sup>29</sup> |
| 2010 | Yokosawa               | 1 | 0 | 1 | 0 | 1 | 0 | 1  | 1  | 0 | NDS | 0  | 1  | 6     | <sup>30</sup> |

|      |          |   |   |   |   |   |   |   |   |   |     |   |   |   |    |
|------|----------|---|---|---|---|---|---|---|---|---|-----|---|---|---|----|
| 2009 | Grahn    | 1 | 0 | 1 | 0 | 1 | 0 | 1 | 1 | 0 | 0   | 0 | 1 | 6 | 31 |
| 2009 | Kang     | 1 | 0 | 1 | 0 | 0 | 0 | 1 | 1 | 0 | NDS | 0 | 0 | 4 | 32 |
| 2009 | Inoue    | 1 | 0 | 1 | 0 | 1 | 0 | 1 | 1 | 0 | 0   | 0 | 0 | 5 | 33 |
| 2008 | Kikuchi  | 1 | 0 | 1 | 0 | 1 | 1 | 1 | 1 | 0 | NDS | 0 | 0 | 6 | 34 |
| 2003 | Fournier | 1 | 0 | 1 | 0 | 0 | 0 | 1 | 1 | 0 | 1   | 1 | 1 | 7 | 35 |
| 1996 | Menei    | 1 | 0 | 1 | 0 | 0 | 0 | 1 | 1 | 0 | 1   | 1 | 1 | 7 | 36 |

Where: 1 = Peer-reviewed publication, 2 = sample size calculation, 3 = random allocation to groups, 4 = blinded assessment of outcome, 5 = compliance with animal welfare regulations, 6 = statement of potential conflict of interests, 7 = uniform volume or number of cells inoculated, 8 = consistent site of tumor implantation, 9 = reported number of animals in which the tumor did not grow, 10 = stated number of excluded animals, and given reasons for exclusion, including anomalies, 11 = explanation of tumor model used, or multiple glioma models used, 12 = presentation of evidence that the chemotherapeutic agent acts directly against tumor. Abbreviations: RP: referred to a previous protocol, NDS: not directly stated, but all animals accounted for, Ref.: Reference.

## References

1. C. C. Parkins, J. H. McAbee, L. Ruff, A. Wendler, R. Mair, R. J. Gilbertson, C. Watts and O. A. Scherman, *Biomaterials*, 2021, **276**, 120919.
2. H. Zhou, D. Chen, T. Gong, Q. He, C. Guo, P. Zhang, X. Song, J. Ruan and T. Gong, *Eur J Pharm Biopharm*, 2021, **166**, 103-110.
3. J. Zhang, C. Chen, A. Li, W. Jing, P. Sun, X. Huang, Y. Liu, S. Zhang, W. Du, R. Zhang, Y. Liu, A. Gong, J. Wu and X. Jiang, *Nat Nanotechnol*, 2021, **16**, 538-548.
4. J. Allen, J. Wang, O. Y. Zolotarskaya, A. Sule, S. Mohammad, S. Arslan, K. J. Wynne, H. Yang and K. Valerie, *J Control Release*, 2020, **321**, 36-48.
5. H. H. Pang, P. Y. Chen, K. C. Wei, C. W. Huang, Y. L. Shiu, C. Y. Huang and H. W. Yang, *Theranostics*, 2019, **9**, 1752-1763.
6. C. Y. Lin, R. J. Li, C. Y. Huang, K. C. Wei and P. Y. Chen, *J Drug Target*, 2018, **26**, 325-332.
7. M. Wehbe, M. Anantha, M. Shi, A. W. Leung, W. H. Dragowska, L. Sanche and M. B. Bally, *Int J Nanomedicine*, 2017, **12**, 4129-4146.
8. W. G. Singleton, A. M. Collins, A. S. Bienemann, C. L. Killick-Cole, H. R. Haynes, D. J. Asby, C. P. Butts, M. J. Wyatt, N. U. Barua and S. S. Gill, *Int J Nanomedicine*, 2017, **12**, 1385-1399.
9. M. M. Nordling-David, R. Yaffe, D. Guez, H. Meirov, D. Last, E. Grad, S. Salomon, S. Sharabi, Y. Levi-Kalisman, G. Golomb and Y. Mardor, *J Control Release*, 2017, **261**, 138-146.
10. B. Adhikari, J. Li, M. G. Brandel, D. Futalan, J. Akers, T. Deming, C. C. Chen and B. S. Carter, *J Clin Neurosci*, 2017, **45**, 288-292.
11. T. J. Chen, T. Gong, T. Zhao, X. Liu, Y. Fu, Z. R. Zhang and T. Gong, *Int J Pharmaceut*, 2017, **528**, 127-132.
12. C. Bastiancich, J. Bianco, K. Vanvarenberg, B. Ucakar, N. Joudiou, B. Gallez, G. Bastiat, F. Lagarce, V. Preat and F. Danhier, *J Control Release*, 2017, **264**, 45-54.
13. R. Zhang, R. Saito, Y. Mano, A. Sumiyoshi, M. Kanamori, Y. Sonoda, R. Kawashima and T. Tominaga, *Drug Deliv*, 2016, **23**, 2780-2786.
14. H. L. Xu, K. L. Mao, C. T. Lu, Z. L. Fan, J. J. Yang, J. Xu, P. P. Chen, D. L. ZhuGe, B. X. Shen, B. H. Jin, J. Xiao and Y. Z. Zhao, *Biomaterials*, 2016, **107**, 44-60.
15. A. Gaudin, E. Song, A. R. King, J. K. Saucier-Sawyer, R. Bindra, D. Desmaele, P. Couvreur and W. M. Saltzman, *Biomaterials*, 2016, **105**, 136-144.

16. R. F. Barth, G. Wu, W. H. Meisen, R. J. Nakkula, W. Yang, T. Huo, D. A. Kellough, P. Kaumaya, C. Turro, L. M. Agius and B. Kaur, *Oncotargets Ther*, 2016, **9**, 2769-2781.
17. G. Lollo, M. Vincent, G. Ullio-Gamboa, L. Lemaire, F. Franconi, D. Couez and J. P. Benoit, *Int J Pharm*, 2015, **495**, 972-980.
18. Z. R. Stephen, F. M. Kievit, O. Veisoh, P. A. Chiarelli, C. Fang, K. Wang, S. J. Hatzinger, R. G. Ellenbogen, J. R. Silber and M. Q. Zhang, *Acs Nano*, 2014, **8**, 10383-10395.
19. G. M. Bernal, M. J. LaRiviere, N. Mansour, P. Pytel, K. E. Cahill, D. J. Voce, S. Kang, R. Spretz, U. Welp, S. E. Noriega, L. Nunez, G. F. Larsen, R. R. Weichselbaum and B. Yamini, *Nanomedicine*, 2014, **10**, 149-157.
20. G. Xi, E. Robinson, B. Mania-Farnell, E. F. Vanin, K. W. Shim, T. Takao, E. V. Allender, C. S. Mayanil, M. B. Soares, D. Ho and T. Tomita, *Nanomedicine*, 2014, **10**, 381-391.
21. A. K. Vellimana, V. R. Recinos, L. Hwang, K. D. Fowers, K. W. Li, Y. G. Zhang, S. Okonma, C. G. Eberhart, H. Brem and B. M. Tyler, *J Neuro-Oncol*, 2013, **111**, 229-236.
22. J. Zhou, T. R. Patel, R. W. Sirianni, G. Strohbehm, M. Q. Zheng, N. Duong, T. Schafbauer, A. J. Huttner, Y. Huang, R. E. Carson, Y. Zhang, D. J. Sullivan, Jr., J. M. Piepmeier and W. M. Saltzman, *Proc Natl Acad Sci U S A*, 2013, **110**, 11751-11756.
23. P. Y. Chen, T. Ozawa, D. C. Drummond, A. Kalra, J. B. Fitzgerald, D. B. Kirpotin, K. C. Wei, N. Butowski, M. D. Prados, M. S. Berger, J. R. Forsayeth, K. Bankiewicz and C. D. James, *Neuro-Oncology*, 2013, **15**, 189-197.
24. T. Ozeki, D. Kaneko, K. Hashizawa, Y. Imai, T. Tagami and H. Okada, *Biol Pharm Bull*, 2012, **35**, 545-550.
25. S. Glage, A. L. Lewis, P. Mertens, S. Baltés, P. Geigle and T. Brinker, *Clin Transl Oncol*, 2012, **14**, 50-59.
26. A. L. Laine, N. T. Huynh, A. Clavreul, J. Balzeau, J. Bejaud, A. Vessieres, J. P. Benoit, J. Eyer and C. Passirani, *Eur J Pharm Biopharm*, 2012, **81**, 690-693.
27. Y. H. Zhang, H. Zhang, J. M. Liu and Z. J. Yue, *Med Oncol*, 2011, **28**, 901-906.
28. E. Allard, D. Jarnet, A. Vessieres, S. Vinchon-Petit, G. Jaouen, J. P. Benoit and C. Passirani, *Pharmaceut Res*, 2010, **27**, 56-64.
29. B. Tyler, K. D. Fowers, K. W. Li, V. R. Recinos, J. M. Caplan, A. Hdeib, R. Grossman, L. Basaldella, K. Bekelis, G. Pradilla, F. Legnani and H. Brem, *J Neurosurg*, 2010, **113**, 210-217.
30. M. Yokosawa, Y. Sonoda, S. Sugiyama, R. Saito, Y. Yamashita, M. Nishihara, T. Satoh, T. Kumabe, M. Yokoyama and T. Tominaga, *Tohoku J Exp Med*, 2010, **221**, 257-264.
31. A. Y. Grahn, K. S. Bankiewicz, M. Dugich-Djordjevic, J. R. Bringas, P. Hadaczek, G. A. Johnson, S. Eastman and M. Luz, *J Neurooncol*, 2009, **95**, 185-197.
32. C. Kang, X. Yuan, Y. Zhong, P. Pu, Y. Guo, A. Albadany, S. Yu, Z. Zhang, Y. Li, J. Chang and J. Sheng, *Technol Cancer Res Treat*, 2009, **8**, 61-70.
33. T. Inoue, Y. Yamashita, M. Nishihara, S. Sugiyama, Y. Sonoda, T. Kumabe, M. Yokoyama and T. Tominaga, *Neuro Oncol*, 2009, **11**, 151-157.
34. T. Kikuchi, R. Saito, S. Sugiyama, Y. Yamashita, T. Kumabe, M. Krauze, K. Bankiewicz and T. Tominaga, *J Neurosurg*, 2008, **109**, 867-873.
35. E. Fournier, C. Passirani, C. Montero-Menei, N. Colin, P. Breton, S. Sagodira, P. Menei and J. P. Benoit, *Cancer*, 2003, **97**, 2822-2829.
36. P. Menei, M. Boisdron-Celle, A. Croue, G. Guy and J. P. Benoit, *Neurosurgery*, 1996, **39**, 117-123; discussion 123-114.
